# Supplementary material for: Transcriptome profiles reveal gene regulation of peanut (Arachis hypogaea L.) nodulation
Source: PubMed Central journal article supplement (PMC5216375; doi:10.1038/srep40066), 2017-01-06
Supplement: srep40066-s1.pdf [file srep40066-s1.pdf]

## Supplementary Information

### Transcriptome profiles reveal gene regulation of peanut (*Arachis hypogaea* L.) nodulation

Ze Peng, Fengxia Liu, Liping Wang, Hai Zhou, Dev Paudel, Lubin Tan, James Maku, Maria Gallo, Jianping Wang\*

\*Corresponding author, Email: wangjp@ufl.edu

Supplementary Table 1. Summary of trimming and alignment of reads to A and B genomes in each library.

| Library name | Genotype | Sample type | Input read pairs | Both surviving    | Forward only surviving | Reverse only surviving | Dropped        | Overall alignment rate (%) |
|--------------|----------|-------------|------------------|-------------------|------------------------|------------------------|----------------|----------------------------|
| 1-FCK2       | F487A    | control     | 13058247         | 10501464 (80.42%) | 1394880 (10.68%)       | 488747 (3.74%)         | 673156 (5.16%) | 63.30                      |
| 2-FCK3       | F487A    | control     | 11499086         | 9359144 (81.39%)  | 1198046 (10.42%)       | 420697 (3.66%)         | 521199 (4.53%) | 64.10                      |
| 3-FCK6       | F487A    | control     | 10882306         | 8824631 (81.09%)  | 1267248 (11.65%)       | 344660 (3.17%)         | 445767 (4.10%) | 64.40                      |
| 4-FT2        | F487A    | treatment   | 11214812         | 9000395 (80.25%)  | 1256070 (11.20%)       | 413764 (3.69%)         | 544583 (4.86%) | 62.70                      |
| 5-FT3        | F487A    | treatment   | 7606390          | 6058212 (79.65%)  | 889256 (11.69%)        | 283970 (3.73%)         | 374952 (4.93%) | 60.20                      |
| 6-FT5        | F487A    | treatment   | 10253258         | 8432203 (82.24%)  | 1099681 (10.73%)       | 334621 (3.26%)         | 386753 (3.77%) | 63.20                      |
| 7-PICK1      | PI262090 | control     | 9938028          | 8097290 (81.48%)  | 1083686 (10.90%)       | 326370 (3.28%)         | 430682 (4.33%) | 64.70                      |
| 8-PICK2      | PI262090 | control     | 12130540         | 9932860 (81.88%)  | 1189125 (9.80%)        | 469750 (3.87%)         | 538805 (4.44%) | 62.00                      |
| 9-PICK3      | PI262090 | control     | 11574363         | 9367944 (80.94%)  | 1300933 (11.24%)       | 399997 (3.46%)         | 505489 (4.37%) | 62.70                      |
| 10-PIT2      | PI262090 | treatment   | 11940182         | 9449775 (79.14%)  | 1417703 (11.87%)       | 437991 (3.67%)         | 634713 (5.32%) | 61.70                      |
| 11-PIT3      | PI262090 | treatment   | 10818936         | 8388088 (77.53%)  | 1442199 (13.33%)       | 390105 (3.61%)         | 598544 (5.53%) | 60.10                      |
| 12-PIT4      | PI262090 | treatment   | 9436075          | 7676177 (81.35%)  | 1053309 (11.16%)       | 320496 (3.40%)         | 386093 (4.09%) | 63.30                      |
| 13-E4CK1     | E4       | control     | 11565431         | 9452894 (81.73%)  | 1148418 (9.93%)        | 442738 (3.83%)         | 521381 (4.51%) | 64.00                      |
| 14-E4CK3     | E4       | control     | 10387342         | 8596082 (82.76%)  | 1053467 (10.14%)       | 351167 (3.38%)         | 386626 (3.72%) | 65.30                      |

|          |    |           |           |                   |                  |                |                |       |
|----------|----|-----------|-----------|-------------------|------------------|----------------|----------------|-------|
| 15-E4CK4 | E4 | control   | 9182335   | 7426986 (80.88%)  | 1083233 (11.80%) | 290887 (3.17%) | 381229 (4.15%) | 62.50 |
| 16-E4T1  | E4 | treatment | 11853554  | 9574662 (80.77%)  | 1286423 (10.85%) | 435063 (3.67%) | 557406 (4.70%) | 59.50 |
| 17-E4T2  | E4 | treatment | 9784316   | 7779661 (79.51%)  | 1167380 (11.93%) | 355354 (3.63%) | 481921 (4.93%) | 60.50 |
| 18-E4T3  | E4 | treatment | 9829616   | 8093329 (82.34%)  | 1056395 (10.75%) | 311953 (3.17%) | 367939 (3.74%) | 63.00 |
| 19-E5CK1 | E5 | control   | 11947025  | 9795657 (81.99%)  | 1180245 (9.88%)  | 449225 (3.76%) | 521898 (4.37%) | 64.50 |
| 20-E5CK3 | E5 | control   | 12307105  | 9950400 (80.85%)  | 1382051 (11.23%) | 430433 (3.50%) | 544221 (4.42%) | 61.20 |
| 21-E5CK4 | E5 | control   | 11063904  | 9000109 (81.35%)  | 1243270 (11.24%) | 368318 (3.33%) | 452207 (4.09%) | 62.20 |
| 22-E5T2  | E5 | treatment | 16053969  | 13121724 (81.74%) | 1555306 (9.69%)  | 609893 (3.80%) | 767046 (4.78%) | 63.80 |
| 23-E5T3  | E5 | treatment | 11834264  | 9786796 (82.70%)  | 1150536 (9.72%)  | 413858 (3.50%) | 483074 (4.08%) | 63.40 |
| 24-E5T4  | E5 | treatment | 10460804  | 8377658 (80.09%)  | 1135375 (10.85%) | 403678 (3.86%) | 544093 (5.20%) | 60.10 |
| 25-E6CK1 | E6 | control   | 10467860  | 8384231 (80.09%)  | 1138436 (10.88%) | 410467 (3.92%) | 534726 (5.11%) | 60.90 |
| 26-E6CK2 | E6 | control   | 12215884  | 10118474 (82.83%) | 1208141 (9.89%)  | 416282 (3.41%) | 472987 (3.87%) | 63.40 |
| 27-E6CK4 | E6 | control   | 11095134  | 8994149 (81.06%)  | 1162509 (10.48%) | 409658 (3.69%) | 528818 (4.77%) | 64.90 |
| 28-E6T3  | E6 | treatment | 13788707  | 11371696 (82.47%) | 1268826 (9.20%)  | 532741 (3.86%) | 615444 (4.46%) | 65.40 |
| 29-E6T4  | E6 | treatment | 10925285  | 8899226 (81.46%)  | 1118063 (10.23%) | 405697 (3.71%) | 502299 (4.60%) | 60.70 |
| 30-E6T6  | E6 | treatment | 9292220   | 7400778 (79.64%)  | 1129840 (12.16%) | 316226 (3.40%) | 445376 (4.79%) | 61.10 |
| 31-E7CK1 | E7 | control   | 9392769   | 7734925 (82.35%)  | 935358 (9.96%)   | 330457 (3.52%) | 392029 (4.17%) | 62.70 |
| 32-E7CK2 | E7 | control   | 12251141  | 9774171 (79.78%)  | 1509440 (12.32%) | 403030 (3.29%) | 564500 (4.61%) | 62.80 |
| 33-E7CK3 | E7 | control   | 11971446  | 9806526 (81.92%)  | 1171496 (9.79%)  | 444872 (3.72%) | 548552 (4.58%) | 64.30 |
| 34-E7T1  | E7 | treatment | 13068308  | 10818141 (82.78%) | 1299056 (9.94%)  | 439061 (3.36%) | 512050 (3.92%) | 64.80 |
| 35-E7T2  | E7 | treatment | 12283865  | 9897366 (80.57%)  | 1324838 (10.79%) | 460071 (3.75%) | 601590 (4.90%) | 61.60 |
| 36-E7T3  | E7 | treatment | 9,870,957 | 7834799 (79.37%)  | 1184117 (12.00%) | 360264 (3.65%) | 491777 (4.98%) | 61.70 |

Supplementary Table 2. Function and expression patterns of differentially expressed genes in the six genotypes including PI262090, F487A, E4, E5, E6, and E7 (submitted as Supplementary Dataset due to big size).

Supplementary Table 3. The enriched gene ontology terms of the differentially expressed genes specific to nodulating genotypes.

| Term                                                                    | Term size | List1 percentage | List2 percentage | Adjusted p-value |
|-------------------------------------------------------------------------|-----------|------------------|------------------|------------------|
| oxidation-reduction process(GO:0055114)                                 | 3139      | 16.56            | 7.69             | 2.30E-05         |
| metabolic process(GO:0008152)                                           | 1915      | 15.92            | 4.64             | 9.68E-11         |
| catalytic activity(GO:0003824)                                          | 2429      | 11.78            | 5.95             | 3.24E-03         |
| heme binding(GO:0020037)                                                | 937       | 8.28             | 2.27             | 4.41E-06         |
| biosynthetic process(GO:0009058)                                        | 392       | 7.01             | 0.92             | 6.54E-10         |
| sequence-specific DNA binding transcription factor activity(GO:0003700) | 952       | 6.05             | 2.32             | 7.88E-03         |
| response to oxidative stress(GO:0006979)                                | 251       | 4.46             | 0.59             | 2.25E-06         |
| peroxidase activity(GO:0004601)                                         | 248       | 4.14             | 0.59             | 1.29E-05         |
| extracellular region(GO:0005576)                                        | 115       | 1.91             | 0.27             | 1.17E-02         |
| cell wall macromolecule catabolic process(GO:0016998)                   | 92        | 1.91             | 0.21             | 3.61E-03         |
| regulation of transcription, DNA-templated(GO:0006355)                  | 5         | 1.59             | 0                | 7.94E-09         |
| monosaccharide binding(GO:0048029)                                      | 5         | 1.59             | 0                | 7.94E-09         |
| positive regulation of mitotic nuclear division(GO:0045840)             | 5         | 1.59             | 0                | 7.94E-09         |
| negative regulation of transcription, DNA-templated(GO:0045892)         | 5         | 1.59             | 0                | 7.94E-09         |
| plant-type cell wall organization(GO:0009664)                           | 61        | 1.27             | 0.14             | 4.24E-02         |
| chitinase activity(GO:0004568)                                          | 43        | 1.27             | 0.1              | 1.33E-02         |
| chitin catabolic process(GO:0006032)                                    | 43        | 1.27             | 0.1              | 1.33E-02         |
| chitin binding(GO:0008061)                                              | 12        | 1.27             | 0.02             | 1.40E-04         |
| phosphorylation(GO:0016310)                                             | 47        | 1.27             | 0.11             | 1.74E-02         |
| response to endogenous stimulus(GO:0009719)                             | 4         | 1.27             | 0                | 6.91E-07         |
| response to organic substance(GO:0010033)                               | 4         | 1.27             | 0                | 6.91E-07         |
| cellular process(GO:0009987)                                            | 4         | 1.27             | 0                | 6.91E-07         |
| cytokinin metabolic process(GO:0009690)                                 | 22        | 0.96             | 0.05             | 2.11E-02         |
| cytokinin dehydrogenase activity(GO:0019139)                            | 22        | 0.96             | 0.05             | 2.11E-02         |

|                                                                                         |    |      |      |          |
|-----------------------------------------------------------------------------------------|----|------|------|----------|
| transcription factor complex(GO:0005667)                                                | 21 | 0.96 | 0.04 | 1.90E-02 |
| endopeptidase inhibitor activity(GO:0004866)                                            | 19 | 0.96 | 0.04 | 1.49E-02 |
| inositol-3-phosphate synthase activity(GO:0004512)                                      | 4  | 0.96 | 0    | 1.40E-04 |
| inositol biosynthetic process(GO:0006021)                                               | 4  | 0.96 | 0    | 1.40E-04 |
| phospholipid biosynthetic process(GO:0008654)                                           | 21 | 0.96 | 0.04 | 1.90E-02 |
| nicotianamine synthase activity(GO:0030410)                                             | 4  | 0.96 | 0    | 1.40E-04 |
| nicotianamine biosynthetic process(GO:0030418)                                          | 4  | 0.96 | 0    | 1.40E-04 |
| defense response to other organism(GO:0098542)                                          | 3  | 0.96 | 0    | 4.50E-05 |
| cellular response to organic substance(GO:0071310)                                      | 3  | 0.96 | 0    | 4.50E-05 |
| single-organism process(GO:0044699)                                                     | 3  | 0.96 | 0    | 4.50E-05 |
| regulation of cellular process(GO:0050794)                                              | 3  | 0.96 | 0    | 4.50E-05 |
| regulation of transcription(GO:0045449)                                                 | 3  | 0.96 | 0    | 4.50E-05 |
| proline dehydrogenase activity(GO:0004657)                                              | 4  | 0.64 | 0    | 1.33E-02 |
| proline catabolic process(GO:0006562)                                                   | 4  | 0.64 | 0    | 1.33E-02 |
| single-organism metabolic process(GO:0044710)                                           | 2  | 0.64 | 0    | 2.69E-03 |
| response to chitin(GO:0010200)                                                          | 2  | 0.64 | 0    | 2.69E-03 |
| transferase activity, transferring acyl groups other than amino-acyl groups(GO:0016747) | 2  | 0.64 | 0    | 2.69E-03 |
| defense response to fungus, incompatible interaction(GO:0009817)                        | 2  | 0.64 | 0    | 2.69E-03 |
| anthranilate N-benzoyltransferase activity(GO:0047672)                                  | 2  | 0.64 | 0    | 2.69E-03 |
| cytokinin binding(GO:0044373)                                                           | 2  | 0.64 | 0    | 2.69E-03 |
| single organismal cell-cell adhesion(GO:0016337)                                        | 2  | 0.64 | 0    | 2.69E-03 |
| negative regulation of cytokinin-activated signaling pathway(GO:0080037)                | 2  | 0.64 | 0    | 2.69E-03 |
| transferase activity, transferring glycosyl groups(GO:0016757)                          | 2  | 0.64 | 0    | 2.69E-03 |
| stomatal complex morphogenesis(GO:0010103)                                              | 2  | 0.64 | 0    | 2.69E-03 |
| anther wall tapetum cell fate specification(GO:0010234)                                 | 2  | 0.64 | 0    | 2.69E-03 |
| transmembrane receptor protein kinase activity(GO:0019199)                              | 2  | 0.64 | 0    | 2.69E-03 |
| microsporogenesis(GO:0009556)                                                           | 2  | 0.64 | 0    | 2.69E-03 |
| response to molecule of bacterial origin(GO:0002237)                                    | 2  | 0.64 | 0    | 2.69E-03 |

|                                                        |   |      |   |          |
|--------------------------------------------------------|---|------|---|----------|
| meiotic nuclear division(GO:0007126)                   | 2 | 0.64 | 0 | 2.69E-03 |
| serine family amino acid metabolic process(GO:0009069) | 2 | 0.64 | 0 | 2.69E-03 |

Note: List 1 corresponds to the DEGs associated with GO terms assigned; List 2 corresponds to the remaining genes in A and B genomes associated with GO terms.

Supplementary Table 4. Peanut genes orthologous to previously identified nodulation related genes in other species (submitted as Supplementary Dataset due to big size).

Supplementary Table 5. Expression levels and primer sequences of selected differentially expressed genes using qRT-PCR.

| Gene name   | RNA-seq regulation | E6 (treatment vs control)            |                                       |                                | E7 (treatment vs control)            |                                       |                                | qRT-PCR consistent with RNA-seq | Forward primer sequence  | Reverse primer sequence     |
|-------------|--------------------|--------------------------------------|---------------------------------------|--------------------------------|--------------------------------------|---------------------------------------|--------------------------------|---------------------------------|--------------------------|-----------------------------|
|             |                    | First bio rep $2^{-\Delta\Delta Cq}$ | Second bio rep $2^{-\Delta\Delta Cq}$ | Average $2^{-\Delta\Delta Cq}$ | First bio rep $2^{-\Delta\Delta Cq}$ | Second bio rep $2^{-\Delta\Delta Cq}$ | Average $2^{-\Delta\Delta Cq}$ |                                 |                          |                             |
| Aradu.0KB9D | UP                 | 7.600                                | 11.410                                | 9.505                          | 0.820                                | 1.052                                 | 0.936                          | Yes                             | GGAGCTTTGT<br>CACTAGGCGT | CAGTCCATCGGT<br>GTCTAGTG    |
| Aradu.398CK | UP                 | 8.666                                | 6.175                                 | 7.420                          | 0.417                                | 1.324                                 | 0.870                          | Yes                             | GGCGTTTGGTT<br>GACAGGAAT | CCGAGAAAGAA<br>TCACGAACTCTG |
| Aradu.62DXS | UP                 | 2.214                                | 1.320                                 | 1.767                          | 0.892                                | 1.332                                 | 1.112                          | Yes (<2 fold change)            | CGTCTTCTTCG<br>GACTCTTCG | CAGGATCCGGTC<br>TTCTTCTG    |
| Aradu.D5TX4 | UP                 | 13.590                               | 2.605                                 | 8.098                          | 0.288                                | 1.052                                 | 0.670                          | Yes                             | GACAAGTTTG<br>GACCGGTGAT | ATGTTGGCGTGG<br>TGACAGTA    |
| Aradu.T3S5X | DOWN               | 0.550                                | 0.614                                 | 0.582                          | 2.563                                | 1.932                                 | 2.248                          | Yes (<2 fold change)            | GAGGTACCGT<br>TCTGCTCCAA | ACAACCATGTCC<br>CAGAGGAG    |
| Aradu.V08Y1 | UP                 | 2.497                                | 3.487                                 | 2.992                          | 0.483                                | 0.420                                 | 0.452                          | Yes                             | GAGGAGGCAC<br>TAGGCAGTGT | CCCCTACTTCTT<br>CCCACCTG    |
| Araip.3UM1W | UP                 | 6.259                                | 3.733                                 | 4.996                          | 1.481                                | 1.945                                 | 1.713                          | Yes                             | GGCCAAAGAC<br>AGTTGGAAGA | TGCAGCCACTGA<br>GATGGTAG    |
| Araip.97GAP | UP                 | 4.052                                | 53.538                                | 28.795                         | 1.580                                | 0.844                                 | 1.212                          | Yes                             | TCAGATCAAG<br>ACAGCCGTTG | GACCACCTCCCA<br>AAACAGAA    |
| Araip.I     | UP                 | 4.548                                | 0.954                                 | 2.751                          | 1.843                                | 1.460                                 | 1.651                          | Yes                             | GTTTCAGGCTT              | AGCTTGCGTGAA                |

|                 |    |        |        |        |       |       |       |     |  |             |              |
|-----------------|----|--------|--------|--------|-------|-------|-------|-----|--|-------------|--------------|
| G14B            |    |        |        |        |       |       |       |     |  | GCACACATC   | GGAATCAC     |
| Araip.<br>NL2P7 | UP | 14.848 | 21.275 | 18.062 | 1.046 | 0.911 | 0.979 | Yes |  | GTATTCATGTT | GGGCTGGTGTCA |
|                 |    |        |        |        |       |       |       |     |  | CTCCATCACC  | AATATGTCA    |

Supplementary Figure 1. Venn diagrams showing shared gene families among *Arachis hypogaea*, *Lotus japonicus*, and *Medicago truncatula* (OrthoMCL 2.0.7, e-value <1e-05). The three numbers under species names, separated by “/”, are the number of gene families, the number of genes in the families, and the total number of genes or protein sequences input into OrthoMCL. A gene family contains at least two genes. (A) The comparison among DEGs specifically in nodulating genotypes and all genes in *Lotus japonicus* and *Medicago truncatula*. (B) The comparison among all genes in these three species.

A

DEGs  
315/440/543

*Lotus japonicus*  
16,581/34,749/48,105

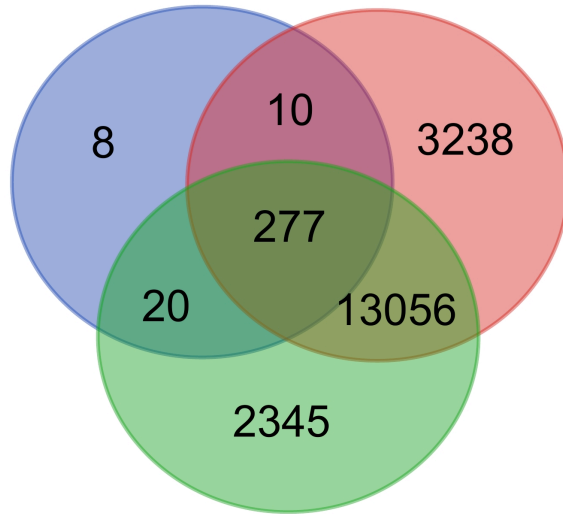

*Medicago truncatula*  
15,698/35,702/50,894

B

*Arachis hypogaea*  
31,767/136,892/234,284

*Lotus japonicus*  
16,903/35,025/48,105

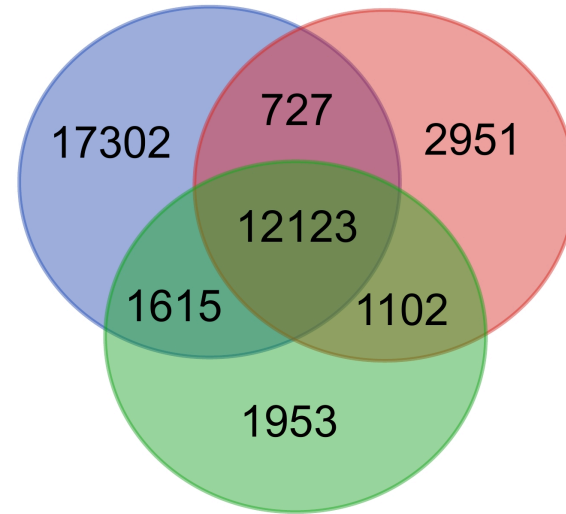

*Medicago truncatula*  
16,793/36,387/50,894
